# Supplementary material
Source: JCI journal article supplement (doi:10.1172/jci195329)
Supplement: sd1 [file 1]

# TLR2 signaling regulates T cell exclusion in pancreatic ductal adenocarcinoma

By Jacqueline Plesset, Meredith L. Stone, John C.  
McVey, Heather Coho, Kelly Markowitz, Kay Coho,  
Jesse Lee, Anna S. Thickens, Devora Delman, Gregory  
L. Beatty

**SUPPLEMENTAL MATERIALS**

## Supplemental Figure 1

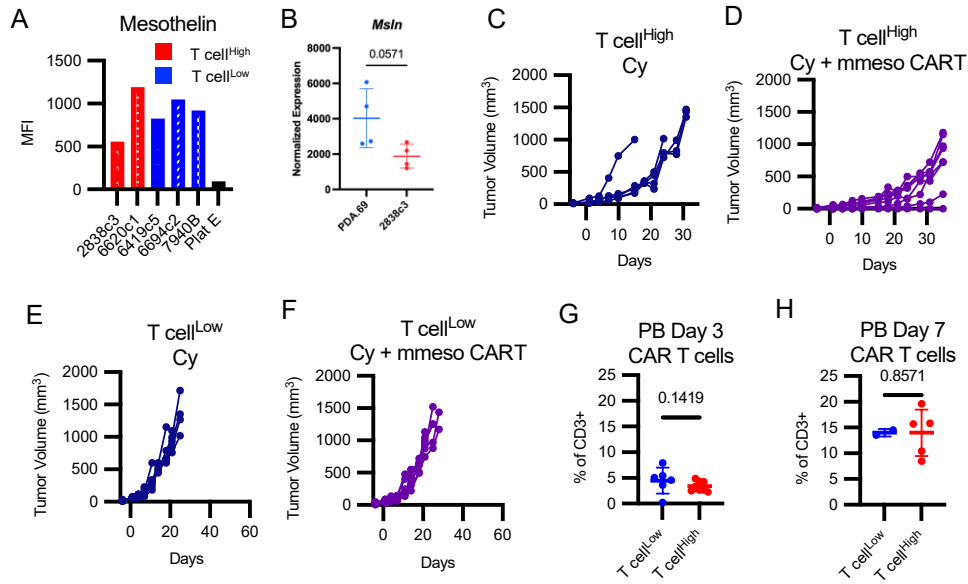

**Supplemental Figure 1. Mesothelin expression and CART cell dynamics in T cell<sup>High</sup> and T cell<sup>Low</sup> PDAC models.** **A)** Mesothelin MFI expression in T cell<sup>High</sup> and T cell<sup>Low</sup> cell lines. Plat E is an engineered 293T cell which does not express mesothelin. **B)** *Msn* expression measured by qRT-PCR in tumors derived *in vivo* from PDA.69 (T cell<sup>Low</sup>) compared to 2838c3 (T cell<sup>High</sup>). Mann Whitney test performed. **C- F)** Mice were treated as in Figure 1B. Individual tumor curves. **G)** Day 3 and **H)** Day 7 of CAR T cell expansion in peripheral blood from mice who received either T cell<sup>High</sup> or T cell<sup>Low</sup> tumors (Mann Whitney test performed).

## Supplemental Figure 2

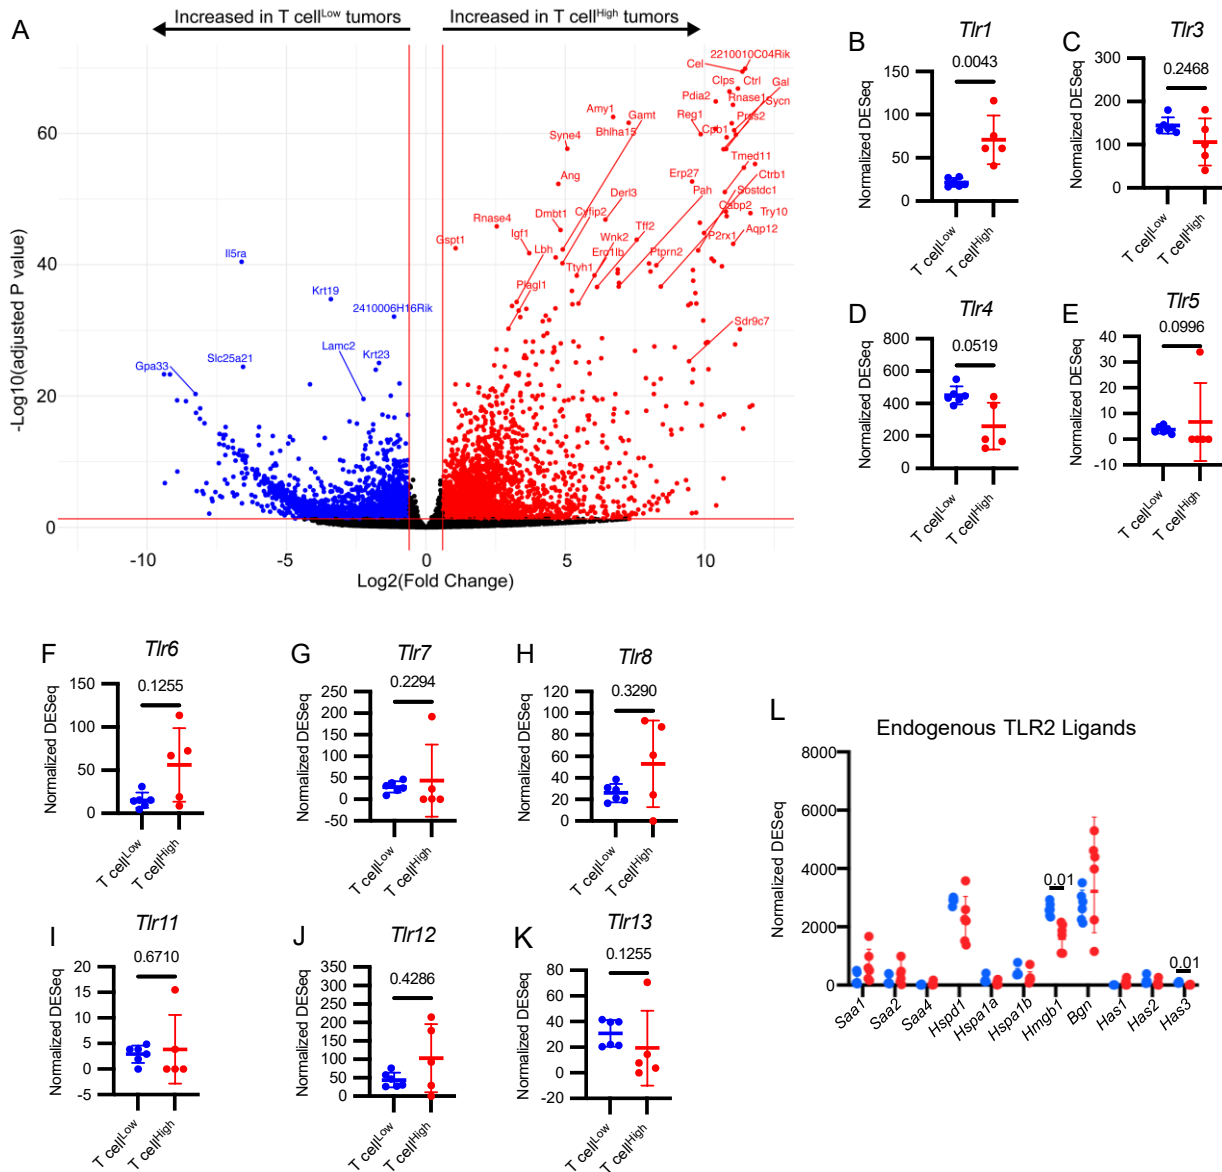

**Supplemental Figure 2. Bulk RNA sequencing in T cell<sup>High</sup> and T cell<sup>Low</sup> mouse PDAC. A)** Volcano plot showing upregulated genes in T cell<sup>High</sup> and T cell<sup>Low</sup> tumors. **B)** Normalized *Tlr1*, **C)** *Tlr3*, **D)** *Tlr4*, **E)** *Tlr5*, **F)** *Tlr6*, **G)** *Tlr7*, **H)** *Tlr8*, **I)** *Tlr11*, **J)** *Tlr12*, **K)** *Tlr13* DESeq expression from bulk RNA-seq data from Figure 2A-C (Mann-Whitney tests performed). **L)** Normalized endogenous TLR2 ligands DESeq expression from bulk RNA-seq data from Figure 2A-C (Mann-Whitney test with correction for multiple comparisons performed).

## Supplemental Figure 3

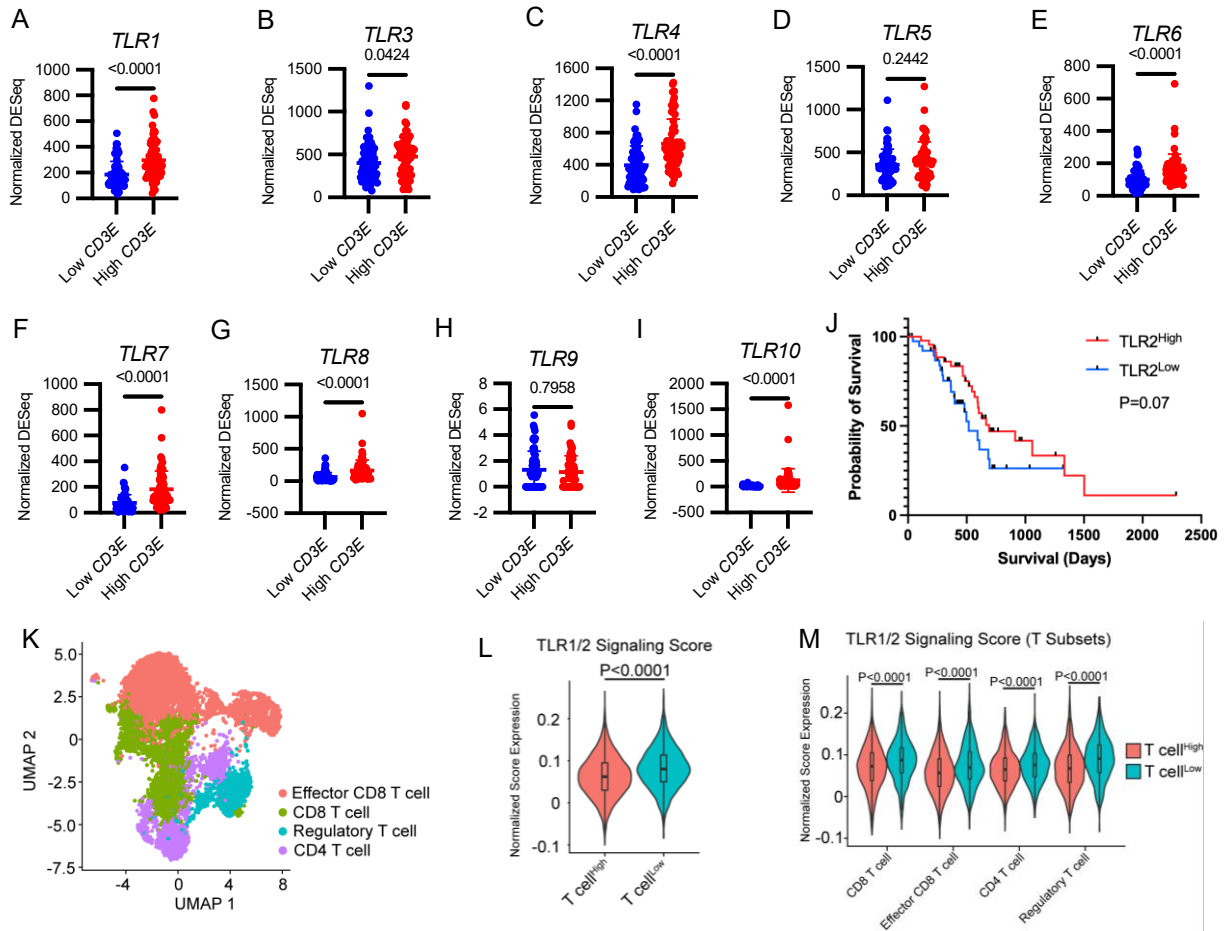

**Supplemental Figure 3. TLR molecule expression and signaling in human PDAC.** **A)** Normalized *TLR1*, **B)** *TLR3*, **C)** *TLR4*, **D)** *TLR5*, **E)** *TLR6*, **F)** *TLR7*, **G)** *TLR8*, **H)** *TLR9*, **I)** *TLR10* RNA expression of high (quartiles 3,4) versus low (quartiles 1,2) *CD3E* gene expression from TCGA data in Figure 2H-J. Mann Whitney tests performed. **J)** Kaplan-Meier curve showing overall survival of high CD3E tumor expressing patients subdivided by *TLR2*<sup>High</sup> and *TLR2*<sup>Low</sup> expression. Log-Rank test performed. **K)** UMAP clustering showing T cell population from Figure 2L. **L)** *TLR1/2* signaling score in T cells between T cell<sup>High</sup> and T cell<sup>Low</sup> tumors. *TLR1/2* signaling score derived from 115 genes in the “Reactome Toll Like Receptor *TLR1* *TLR2* Cascade” gene set. Mann Whitney test performed. **M)** *TLR1/2* signaling score between T cell subsets identified in J. Mann Whitney test performed.

## Supplemental Figure 4

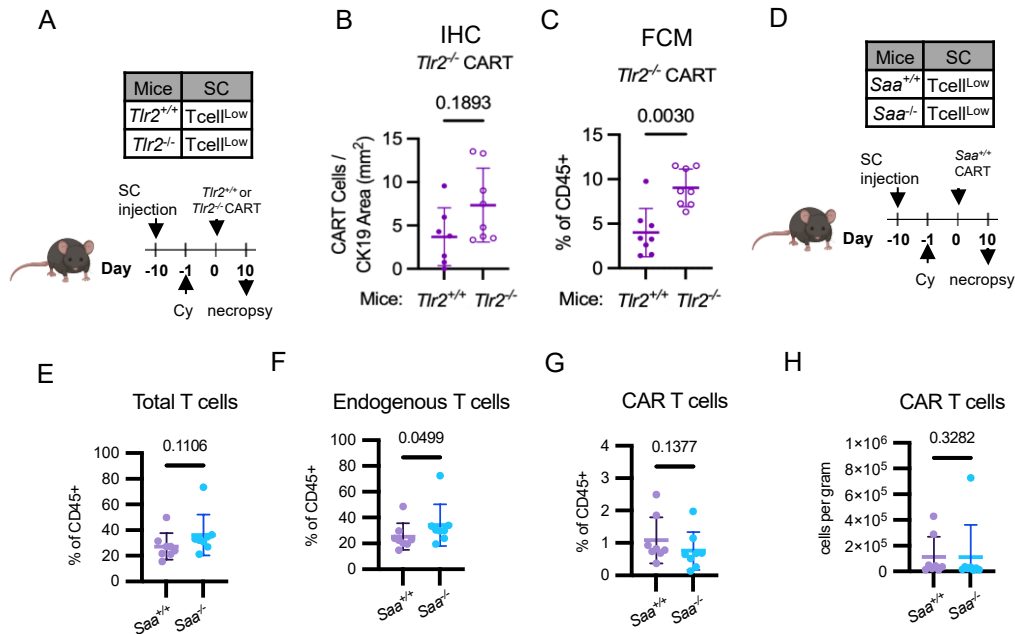

**Supplemental Figure 4. Impact of SAA and TLR2 deficiency on endogenous T cell and meso-CAR T cell infiltration in T cell<sup>Low</sup> PDAC model.** **A)** Study design of G and H. T cell<sup>Low</sup> cells (1e6) were implanted subcutaneously into *Saa*<sup>+/+</sup> and *Saa*<sup>-/-</sup> mice on day -10. Each group consisted of 8 mice. On day -1, mice received cyclophosphamide (120mg/kg dose, i.p.) and received meso *Tlr2*<sup>+/+</sup> or *Tlr2*<sup>-/-</sup> CAR-T cells (5-8e6 cells/mouse, i.v.) on days 0 with necropsy 10 days later. **B)** Immunohistochemistry showing *Tlr2*<sup>-/-</sup> CAR-T cell infiltration into PDAC tumors of *Tlr2*<sup>+/+</sup> and *Tlr2*<sup>-/-</sup> mice. **C)** Flow cytometry showing *Tlr2*<sup>-/-</sup> CAR-T cell infiltration into PDAC tumors of *Tlr2*<sup>+/+</sup> and *Tlr2*<sup>-/-</sup> mice. **D)** Study design of B-E. T cell<sup>Low</sup> cells (1e6) were implanted subcutaneously into *Saa*<sup>+/+</sup> and *Saa*<sup>-/-</sup> mice on day -10. Each group consisted of 8 mice. On day -1, mice received cyclophosphamide (120mg/kg dose, i.p.) and received meso *Saa*<sup>+/+</sup> CAR-T cells (5-8e6 cells/mouse, i.v.) on days 0 with necropsy 10 days later. **E)** Analysis of Total T cell, **F)** Endogenous T cell, and **G)** CAR T cell percentages in the tumors via flow cytometry (Mann Whitney tests performed). **H)** Analysis of CAR T cells per gram in the tumors via flow cytometry (Mann Whitney tests performed).

## Supplemental Figure 5

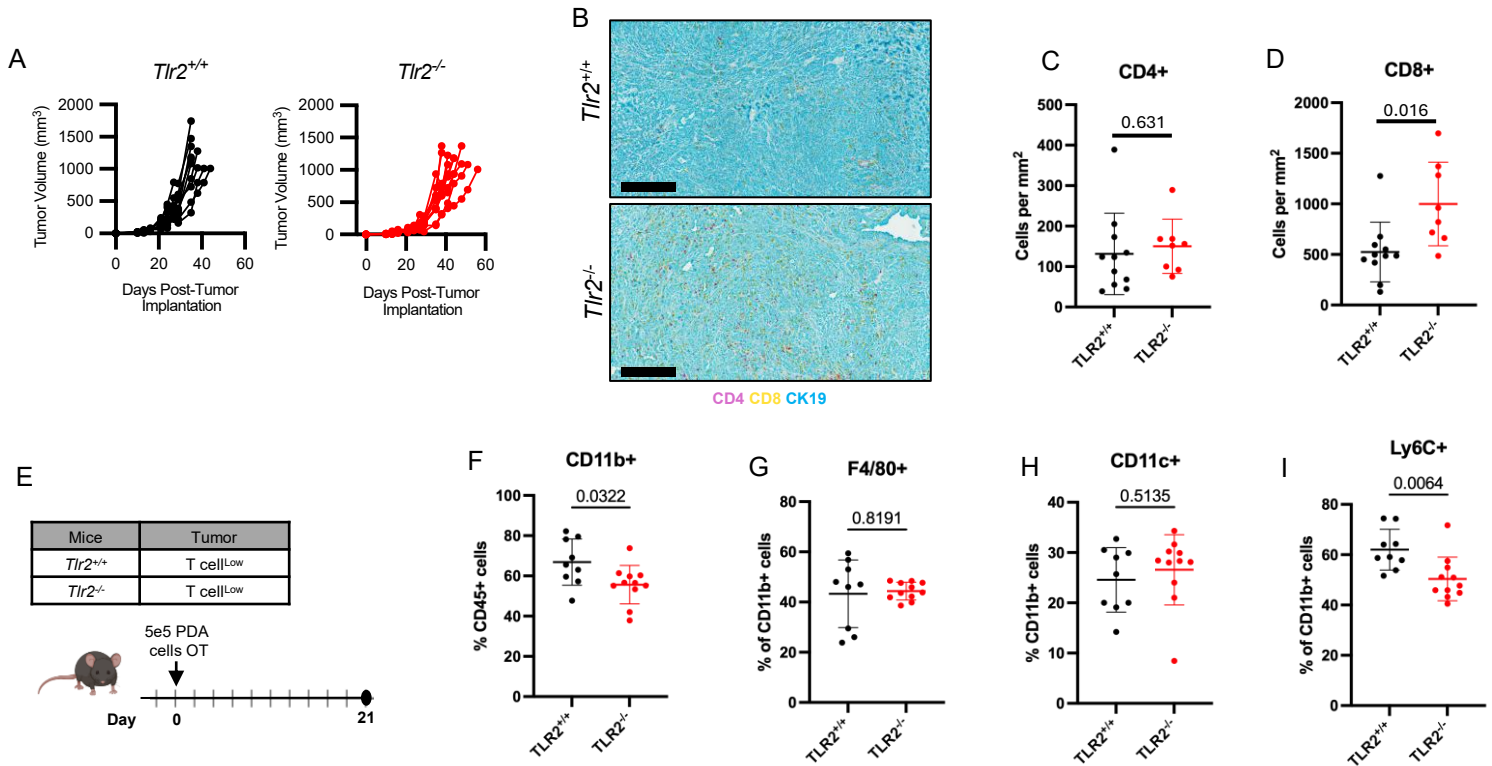

**Supplemental Figure 5. T cell and myeloid cell profiling of T cell<sup>Low</sup> tumors in *Tlr2*<sup>+/+</sup> vs *Tlr2*<sup>-/-</sup> mice. **A**) Mice were treated as in Figure 4A. Individual tumor curves are shown. **B**) Representative images of tumors stained for CD4 (pink), CD8 (yellow) and CK19 (blue). Scale bar, 300 $\mu$ m. **C**) Analysis of T cell (CD4 stained) per tumor area (CK19 stained) from A (Welch's test performed). **D**) Analysis of T cell (CD8 stained) per tumor area (CK19 stained) from A (Welch's test performed). **E**) Study schematic for F-G. T cell<sup>Low</sup> (PDA.69) cells (5e5) were implanted orthotopically into *Tlr2*<sup>+/+</sup> or *Tlr2*<sup>-/-</sup> mice (n=9-11 mice/group) on Day 0. Data shown are representative of n=1 biological replicates. **F**) Analysis of CD11b<sup>+</sup> myeloid cells as a percentage of CD45 cells in the tumors via flow cytometry (Mann Whitney test performed). **G**) Analysis of F4/80<sup>+</sup> macrophages as a percentage of CD11b<sup>+</sup> cells in the tumors via flow cytometry (Mann Whitney test performed). **H**) Analysis of CD11c<sup>+</sup> dendritic cells as a percentage of CD11b<sup>+</sup> cells in the tumors via flow cytometry (Mann Whitney test performed). **I**) Analysis of LY6c<sup>+</sup> monocytes as a percentage of CD11b<sup>+</sup> cells in the tumors via flow cytometry (Mann Whitney test performed).**

## Supplemental Figure 6

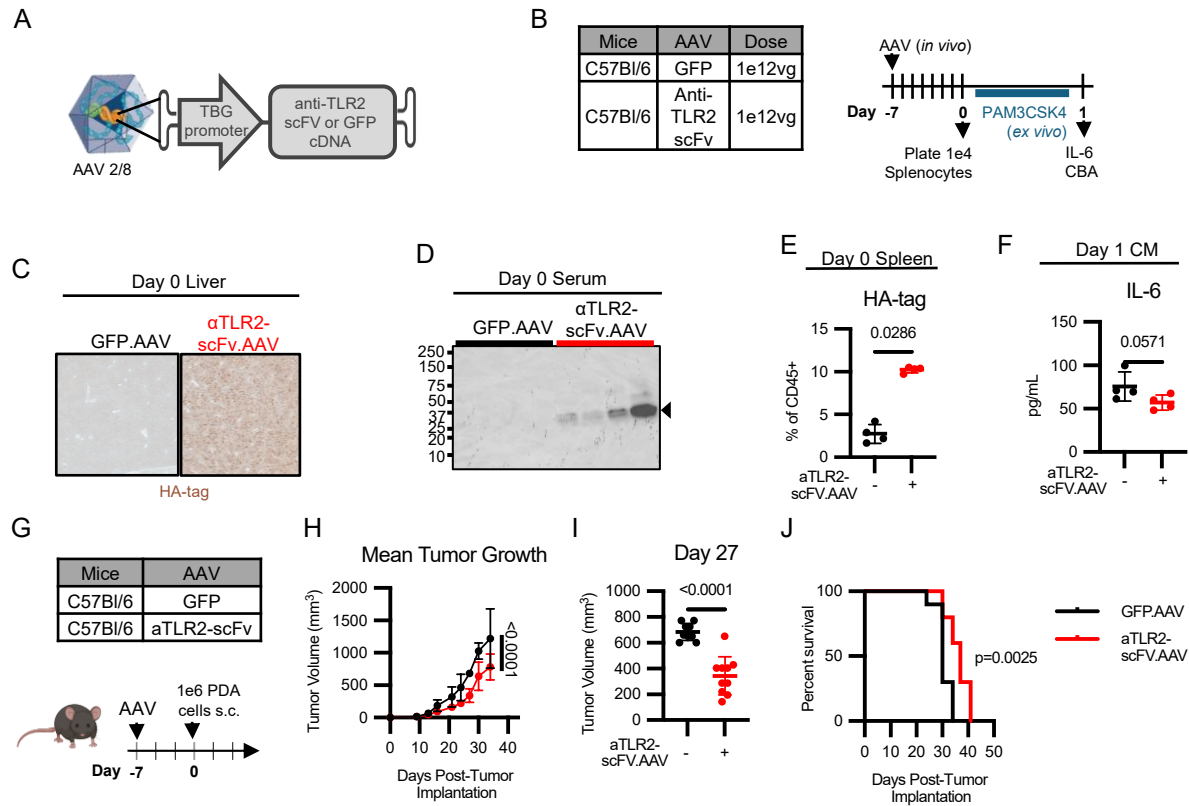

**Supplemental Figure 6. Characterization and efficacy of TLR2-blocking scFv in PDAC model. A)** Design of an AAV to express a TLR2 blocking scFv with an HA tag ( $\alpha$ TLR2-scFv) in hepatocytes. **B)** Study schematic. Mice were treated with  $1e12$  viral genomes (vg) of the AAVs indicated. 7 days later, splenocytes were harvested and treated *ex vivo* with TLR2 agonist PAM3CSK4 ( $1000\text{ng/mL}$ ) **C)** Immunohistochemistry showing expression of  $\alpha$ TLR2-scFv in hepatocytes of mice treated as in (B). Livers were stained for HA. **D)** Western blot detecting  $\alpha$ TLR2-scFv in serum of mice treated as in (B). Membranes were blotted for HA. Arrow indicates anti-TLR2-scFv at 27 kDa. **E)** Spleens were analyzed by flow cytometry for binding of  $\alpha$ TLR2-scFv to splenocytes. scFv binding is accessed by detection of HA. **F)** IL-6 in media of splenocytes harvested from mice as in (B) and treated with PAM3CSK4 overnight. **G)** Study schematic. Mice were treated with AAVs (GFP or aTLR2-scFv). 7 days later, T cell<sup>LOW</sup> tumor cells were subcutaneously implanted. Mice were monitored for overall survival. **H)** Mean tumor growth curves (two-way ANOVA test performed) **I)** Tumor volume Day 27 (Mann Whitney test performed). **J)** Overall survival (Mantel Cox test performed).

## Supplemental Figure 7

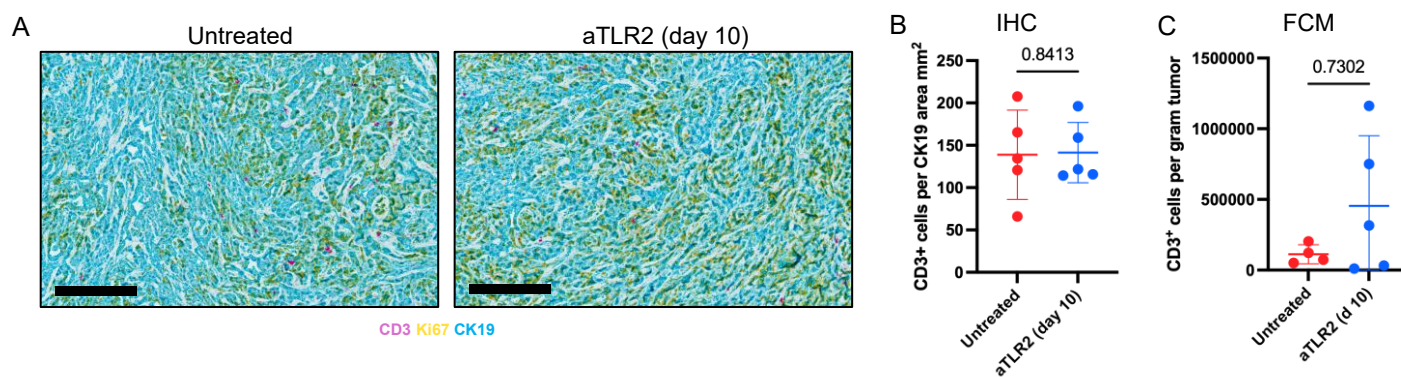

**Supplemental Figure 7. Characterization of T cell tumor infiltration in therapeutic anti-TLR2 antibody treatment.** **A)** Representative IHC images of untreated and anti-TLR2 treated mice. Anti-TLR2 treatment started on day 10 and was dosed at 0.2mg every 3-4 days. Tumors were collected on day 15. **B)** Quantification of A. Mann-Whitney test performed. **C)** Flow cytometry of tumors staining for CD3<sup>+</sup> cells from untreated and anti-TLR2 treated mice (day 10). Mann-Whitney test performed.

# Supplemental Table 1

| Application   | Target Antigen/ Cell | Target Species | Host Species | Clone   | Conjugation | Dilution | Vendor      | Catalog #              |              |
|---------------|----------------------|----------------|--------------|---------|-------------|----------|-------------|------------------------|--------------|
| Automated IHC | Primary Antibody     | CD3            | Mouse        | Rabbit  | Polyclonal  | Unconj.  | 1:200       | Abcam                  | ab5690       |
|               |                      | Ki67           | Mouse        | Rabbit  | D3B5        | Unconj.  | 1:200       | Cell Signaling         | 12202        |
|               |                      | CK19           | Mouse        | Rabbit  | EPNCIR127B  | Unconj.  | 1:800       | Abcam                  | ab133496     |
|               |                      | GFP            | Mouse        | Goat    | Polyclonal  | Unconj.  | 1:300       | Abcam                  | ab6673       |
|               |                      | HA             | Mouse        | Chicken | Polyclonal  | Unconj.  | 1:800       | Abcam                  | ab1190       |
|               | Secondary Antibody   | HQ             | N/A          | N/A     | N/A         | HRP      | No dilution | Roche                  | 760-4820     |
|               |                      | IgG            | Rabbit       | Goat    | Polyclonal  | NP       | No dilution | Roche                  | 760-4817     |
|               |                      | IgG            | Rabbit       | Goat    | Polyclonal  | HQ       | No dilution | Roche                  | 760-4815     |
|               |                      | NP             | N/A          | Mouse   | Monoclonal  | AP       | No dilution | Roche                  | 760-4827     |
|               |                      | IgG            | Goat         | N/A     | N/A         | HRP      | No dilution | Roche                  | 760-4647     |
|               |                      | IgG            | Chicken      | Rabbit  | Polyclonal  | HRP      | 1:3000      | Jackson ImmunoResearch | 303-035- 003 |

| Chromogen   | Application(s) used | Vendor | Catalog # |
|-------------|---------------------|--------|-----------|
| Purple      | Automated IHC       | Roche  | 760-229   |
| Teal        | Automated IHC       | Roche  | 760-247   |
| Yellow      | Automated IHC       | Roche  | 760-239   |
| DAB (Brown) | Automated IHC       | Roche  | 760-159   |

**Supplemental Table 1: Antibodies and reagents for immunohistochemistry.**

IHC, immunohistochemistry

## Supplemental Table 2

| Application | Target Antigen/<br>Cell | Target<br>Species | Host<br>Species | Clone        | Conjugation | Dilution  | Vendor         | Catalog # |
|-------------|-------------------------|-------------------|-----------------|--------------|-------------|-----------|----------------|-----------|
| FCM         | CD11b                   | Mouse             | Rat             | M1/70        | PerCp       | 1:100     | BD Biosciences | 561114    |
|             | CD11c                   | Mouse             | Hamster         | HL3          | PE-Cy7      | 1:100     | BD Biosciences | 558079    |
|             | CD11c                   | Mouse             | Hamster         | N418         | APC         | 1:100     | BioLegend      | 117310    |
|             | CD11c                   | Mouse             | Hamster         | N418         | FITC        | 1:100     | BioLegend      | 117306    |
|             | CD19                    | Mouse             | Rat             | 6D5          | PB          | 1:100     | BioLegend      | 115523    |
|             | CD3                     | Mouse             | Rat             | 17A2         | PE-Cy7      | 1:100     | BioLegend      | 100220    |
|             | CD3                     | Mouse             | Rat             | 17A2         | PB          | 1:100     | BioLegend      | 100214    |
|             | CD45                    | Mouse             | Rat             | 30-F11       | PerCp       | 1:100     | BD Biosciences | 550994    |
|             | CD45                    | Mouse             | Rat             | 30-F11       | PE-Cy7      | 1:100     | BD Biosciences | 552848    |
|             | CD45                    | Mouse             | Rat             | 30-F11       | APC-Cy7     | 1:100     | BD Biosciences | 561037    |
|             | CD45.1                  | Mouse             | Mouse           | A20          | APC-Cy7     | 1:100     | BioLegend      | 110716    |
|             | CD45.2                  | Mouse             | Mouse           | 104          | PE-Cy7      | 1:100     | BioLegend      | 109830    |
|             | F4/80                   | Mouse             | Rat             | BM8          | PB          | 1:100     | BioLegend      | 123124    |
|             | F4/80                   | Mouse             | Rat             | BM8          | APC         | 1:100     | BioLegend      | 123116    |
|             | F4/80                   | Mouse             | Rat             | BM8          | APC-Cy7     | 1:100     | BioLegend      | 123118    |
|             | Goat anti-Rat           | Rat               | Goat            | Poly4054     | PE-Cy7      | 1:100     | BioLegend      | 405413    |
|             | HA                      | N/A               | Mouse           | 16B12        | PE-Cy7      | 1:100     | BioLegend      | 901528    |
|             | Ly6C                    | Mouse             | Rat             | HK1.4        | PB          | 1:100     | BioLegend      | 128014    |
|             | Ly6C                    | Mouse             | Rat             | HK1.5        | FITC        | 1:100     | BioLegend      | 128006    |
|             | Ly6G                    | Mouse             | Rat             | 1A8          | PB          | 1:100     | BioLegend      | 127612    |
| Mesothelin  | Mouse                   | Rat               | B35             | Unconjugated | 1:200       | Isbio     | LS-C179484-100 |           |
| TLR2        | Mouse                   | Rat               | CB225           | PE           | 1:100       | BioLegend | 148604         |           |

**Supplementary Table 2: Antibodies for flow cytometry.**  
FCM, flow cytometry

**Supplemental Table 3**

| Gene       | Forward Sequence      | Reverse Sequence |
|------------|-----------------------|------------------|
| <i>ltr</i> | GGAACCCCTAGTGATGGAGTT | CGGCCTCAGTGAGCGA |

**Supplementary Table 3: Primer sequences.**

# Supplemental Table 4

Supplemental Table 4: Top 100 differentially expressed genes between T cell<sup>Low</sup> vs T cell<sup>High</sup> tumors.

| Gene ID       | Log2(Fold Change) | Log2(Fold Change) | SE        | P value   | Adjusted P value |
|---------------|-------------------|-------------------|-----------|-----------|------------------|
| Hamp2         | 10.02095329       | 0.422064518       | 1.31E-124 | 2.13E-120 |                  |
| Cela2a        | 11.78088221       | 0.574808499       | 2.37E-93  | 1.93E-89  |                  |
| Cela1         | 10.98340098       | 0.543259789       | 6.86E-91  | 3.72E-87  |                  |
| Cckar         | 10.92199865       | 0.578754836       | 1.95E-79  | 7.95E-76  |                  |
| Tmed6         | 9.280159594       | 0.506629646       | 6.01E-75  | 1.96E-71  |                  |
| Pla2g1b       | 10.70418347       | 0.585181145       | 9.57E-75  | 2.60E-71  |                  |
| Chst2         | 6.209435988       | 0.340818529       | 3.64E-74  | 8.45E-71  |                  |
| 2210010C04Rik | 11.45159128       | 0.629720499       | 6.76E-74  | 1.38E-70  |                  |
| Cel           | 11.3556429        | 0.626607695       | 2.12E-73  | 3.83E-70  |                  |
| Ctrl          | 11.19432734       | 0.629322607       | 8.77E-71  | 1.43E-67  |                  |
| Cbps          | 10.88934166       | 0.614334038       | 2.67E-70  | 3.95E-67  |                  |
| Pdia2         | 10.39605771       | 0.593266509       | 9.49E-69  | 1.29E-65  |                  |
| Rnase1        | 11.01596442       | 0.631258013       | 3.39E-68  | 4.25E-65  |                  |
| Amy1          | 6.718569909       | 0.390620217       | 2.67E-66  | 3.10E-63  |                  |
| Bhlha15       | 7.274057322       | 0.42596115        | 2.21E-65  | 2.40E-62  |                  |
| Cpb1          | 10.96876012       | 0.642755894       | 2.69E-65  | 2.74E-62  |                  |
| Cuzd1         | 10.382839         | 0.612639126       | 2.00E-64  | 1.91E-61  |                  |
| Gal           | 11.05718312       | 0.653728186       | 3.55E-64  | 3.21E-61  |                  |
| Reg1          | 9.861482965       | 0.585964648       | 1.48E-63  | 1.27E-60  |                  |
| Zg16          | 11.12281637       | 0.661386773       | 1.82E-63  | 1.48E-60  |                  |
| Cpa1          | 10.78570951       | 0.643584756       | 4.88E-63  | 3.78E-60  |                  |
| Syne4         | 5.071715152       | 0.30712988        | 2.95E-61  | 2.18E-58  |                  |
| Sycn          | 10.76897142       | 0.652356836       | 3.22E-61  | 2.28E-58  |                  |
| Prss2         | 10.67254483       | 0.646807686       | 3.65E-61  | 2.47E-58  |                  |
| Try4          | 11.80423965       | 0.729445636       | 6.70E-59  | 4.36E-56  |                  |
| Pnlip         | 11.40934665       | 0.708745891       | 2.64E-58  | 1.65E-55  |                  |
| 1810018F18Rik | 12.44226346       | 0.781806062       | 5.01E-57  | 3.02E-54  |                  |
| Erp27         | 9.548608753       | 0.604634962       | 3.51E-56  | 2.04E-53  |                  |
| Ang           | 4.75131454        | 0.30191297        | 8.39E-56  | 4.71E-53  |                  |
| Tmed11        | 10.72420241       | 0.689581909       | 1.55E-54  | 8.40E-52  |                  |
| Cabp2         | 10.76565493       | 0.712650495       | 1.47E-51  | 7.70E-49  |                  |
| Tnfr10        | 11.64154875       | 0.772684462       | 2.70E-51  | 1.37E-48  |                  |
| Cpa2          | 10.78649867       | 0.71946553        | 8.24E-51  | 4.06E-48  |                  |
| Derl3         | 6.441117489       | 0.431961884       | 2.78E-50  | 1.33E-47  |                  |
| Slc38a5       | 9.826867207       | 0.662277343       | 8.32E-50  | 3.87E-47  |                  |
| Rnase4        | 2.540181349       | 0.172219139       | 3.09E-49  | 1.40E-46  |                  |
| Dmbt1         | 4.82897161        | 0.329394293       | 1.16E-48  | 5.10E-46  |                  |
| Ctrb1         | 9.982584948       | 0.684387484       | 3.44E-48  | 1.47E-45  |                  |
| 1810010D01Rik | 7.560580508       | 0.524144274       | 3.62E-47  | 1.51E-44  |                  |
| Aqp12         | 11.02465064       | 0.769884833       | 1.64E-46  | 6.69E-44  |                  |
| Gsp1          | 1.066570157       | 0.075037426       | 7.52E-46  | 2.98E-43  |                  |
| Gamt          | 4.909675923       | 0.346177861       | 1.18E-45  | 4.55E-43  |                  |
| Sostdc1       | 9.766803203       | 0.689851165       | 1.67E-45  | 6.32E-43  |                  |
| Igf1          | 3.707953555       | 0.263236943       | 4.63E-45  | 1.71E-42  |                  |
| ambiguous     | 4.654445208       | 0.332923422       | 2.05E-44  | 7.41E-42  |                  |
| Cela3b        | 10.25173583       | 0.735059491       | 3.29E-44  | 1.16E-41  |                  |
| Spink1        | 10.33290522       | 0.744301246       | 8.07E-44  | 2.79E-41  |                  |
| Ilfra         | -6.610190489      | 0.47671447        | 1.02E-43  | 3.44E-41  |                  |
| Cyfp2         | 4.899417975       | 0.354304292       | 1.72E-43  | 5.72E-41  |                  |
| Dusp26        | 8.004555857       | 0.579278746       | 1.98E-43  | 6.45E-41  |                  |
| Ptpm2         | 8.265879555       | 0.600253568       | 8.83E-43  | 1.22E-40  |                  |
| Cela3a        | 10.61873677       | 0.77254428        | 5.45E-43  | 1.70E-40  |                  |
| Cldn10        | 6.886072606       | 0.50401335        | 1.70E-42  | 5.22E-40  |                  |
| Pnliprp1      | 9.582680966       | 0.702252179       | 2.14E-42  | 6.46E-40  |                  |
| Hsd17b13      | 8.054333343       | 0.591797934       | 3.50E-42  | 1.03E-39  |                  |
| Egf           | 6.877982612       | 0.507099016       | 6.60E-42  | 1.92E-39  |                  |
| Ero1b         | 6.049735999       | 0.448000311       | 1.48E-41  | 4.24E-39  |                  |
| Ttyh1         | 5.413192941       | 0.401014581       | 1.59E-41  | 4.46E-39  |                  |
| Klk1b5        | 9.587301001       | 0.717423392       | 9.88E-41  | 2.72E-38  |                  |
| Fam174b       | 6.92876811        | 0.520688709       | 2.11E-40  | 5.72E-38  |                  |
| Pah           | 6.915388572       | 0.523565532       | 7.86E-40  | 2.10E-37  |                  |
| P2rx1         | 8.427221588       | 0.638100595       | 8.02E-40  | 2.11E-37  |                  |
| Tff2          | 6.138213786       | 0.465251646       | 9.59E-40  | 2.48E-37  |                  |
| Prss8         | 5.236457417       | 0.399995371       | 3.69E-39  | 9.39E-37  |                  |
| Klk1          | 9.664382013       | 0.741679554       | 8.22E-39  | 2.06E-36  |                  |
| Krt19         | -3.408891696      | 0.26494253        | 6.95E-38  | 1.71E-35  |                  |
| Lbh           | 3.252310488       | 0.254307271       | 1.89E-37  | 4.59E-35  |                  |
| Wnk2          | 5.47196898        | 0.429379292       | 3.37E-37  | 7.95E-35  |                  |
| Amy2b         | 9.702994433       | 0.76135428        | 3.35E-37  | 7.95E-35  |                  |
| Klk1b11       | 9.502666461       | 0.74589067        | 3.54E-37  | 8.24E-35  |                  |
| Casp9         | 5.256417051       | 0.413157497       | 4.43E-37  | 1.02E-34  |                  |
| Gp2           | 9.41380807        | 0.741501688       | 6.25E-37  | 1.41E-34  |                  |
| Cachd1        | 3.091499835       | 0.243942017       | 8.34E-37  | 1.86E-34  |                  |
| Ggh           | 4.649057312       | 0.368870424       | 2.02E-36  | 4.44E-34  |                  |
| Hnmt          | 3.604358789       | 0.286256839       | 2.36E-36  | 5.11E-34  |                  |
| Mall          | 3.32838687        | 0.265436522       | 4.55E-36  | 9.74E-34  |                  |
| Nupr1         | 4.299310321       | 0.346762806       | 2.67E-35  | 5.63E-33  |                  |
| 2410006H16Rik | -1.143641083      | 0.092460621       | 3.85E-35  | 8.03E-33  |                  |
| Tbc1d30       | 3.38265381        | 0.273772897       | 4.54E-35  | 9.35E-33  |                  |
| Slc39a5       | 4.422754308       | 0.360478627       | 1.33E-34  | 2.70E-32  |                  |
| Klk1b3        | 9.949883329       | 0.81173814        | 1.53E-34  | 3.08E-32  |                  |
| Edem2         | 4.18907618        | 0.342375952       | 1.95E-34  | 3.88E-32  |                  |
| Plagl1        | 2.962957841       | 0.246551322       | 2.87E-33  | 5.63E-31  |                  |
| Ctrc          | 11.26329808       | 0.938366504       | 3.42E-33  | 6.63E-31  |                  |
| Cbs           | 4.349952272       | 0.365988781       | 1.41E-32  | 2.70E-30  |                  |
| Sel1l         | 4.219819241       | 0.357253593       | 3.39E-32  | 6.42E-30  |                  |
| Klf15         | 6.316787626       | 0.538223789       | 8.30E-32  | 1.55E-29  |                  |
| Slc7a8        | 5.291087842       | 0.454603097       | 2.61E-31  | 4.83E-29  |                  |
| Anpep         | 3.843262484       | 0.330306137       | 2.72E-31  | 4.98E-29  |                  |
| Mknk1         | 3.57508864        | 0.307315302       | 2.79E-31  | 5.05E-29  |                  |
| Try5          | 10.09596579       | 0.86904932        | 3.37E-31  | 6.02E-29  |                  |
| Prom2         | 10.11917382       | 0.871439067       | 3.58E-31  | 6.33E-29  |                  |
| Pnliprp2      | 10.0392399        | 0.866557234       | 4.90E-31  | 8.57E-29  |                  |
| Fam46c        | 4.836827863       | 0.41792858        | 5.63E-31  | 9.74E-29  |                  |
| Klk1b8        | 11.09353054       | 0.960958808       | 7.89E-31  | 1.35E-28  |                  |
| Pnmal2        | 5.483950506       | 0.47757171        | 1.61E-30  | 2.72E-28  |                  |
| Lrrc7         | 8.197481507       | 0.714059117       | 1.66E-30  | 2.79E-28  |                  |
| Gabra4        | 8.927151588       | 0.779138345       | 2.15E-30  | 3.57E-28  |                  |
| Ptger3        | 4.599637381       | 0.401659053       | 2.31E-30  | 3.79E-28  |                  |
| Angpt1        | 2.531806575       | 0.222223697       | 4.53E-30  | 7.37E-28  |                  |

**Supplemental Table 5**

| <b>Characteristics of the cohort</b>                                                                                            |  |            |
|---------------------------------------------------------------------------------------------------------------------------------|--|------------|
| n=179                                                                                                                           |  |            |
| <b>Demographic information</b>                                                                                                  |  |            |
| Age                                                                                                                             |  | 65 [57-73] |
| Sex (Male)                                                                                                                      |  | 98 (54.7)  |
| Race                                                                                                                            |  |            |
| African American                                                                                                                |  | 7 (3.9)    |
| Asian                                                                                                                           |  | 10 (5.6)   |
| Hispanic                                                                                                                        |  | 5 (2.8)    |
| White                                                                                                                           |  | 157 (84.9) |
| Not reported                                                                                                                    |  | 5 (2.8)    |
| <b>Tumor characteristics</b>                                                                                                    |  |            |
| T stage                                                                                                                         |  |            |
| T1                                                                                                                              |  | 6 (3.4)    |
| T2                                                                                                                              |  | 23(12.8)   |
| T3                                                                                                                              |  | 144 (80.4) |
| T4                                                                                                                              |  | 4 (2.2)    |
| Not reported                                                                                                                    |  | 2 (1.2)    |
| N stage                                                                                                                         |  |            |
| N0                                                                                                                              |  | 48 (26.8)  |
| N1                                                                                                                              |  | 127 (70.9) |
| Not reported                                                                                                                    |  | 4 (2.3)    |
| M stage                                                                                                                         |  |            |
| M0                                                                                                                              |  | 81 (45.3)  |
| M1                                                                                                                              |  | 5 (2.8)    |
| Not reported                                                                                                                    |  | 93 (52.0)  |
| Location                                                                                                                        |  | 3 (60)     |
| Head of pancreas                                                                                                                |  | 132 (73.7) |
| Body of pancreas                                                                                                                |  | 15 (8.4)   |
| Tail of pancreas                                                                                                                |  | 13 (7.3)   |
| Overlapping lesion                                                                                                              |  | 2 (1.1)    |
| Not specified                                                                                                                   |  | 17 (9.5)   |
| <p>Note: Continuous data is presented as mean ± standard deviation while count data is shown as number (%) or median [IQR].</p> |  |            |

**Supplemental Table 5: Patient characteristics of dataset used for analysis of patients with pancreas cancer.**
