# Supplementary material
Source: JCI journal article supplement (doi:10.1172/jci195329)

Full unedited gel for Supplemental Figure 6D

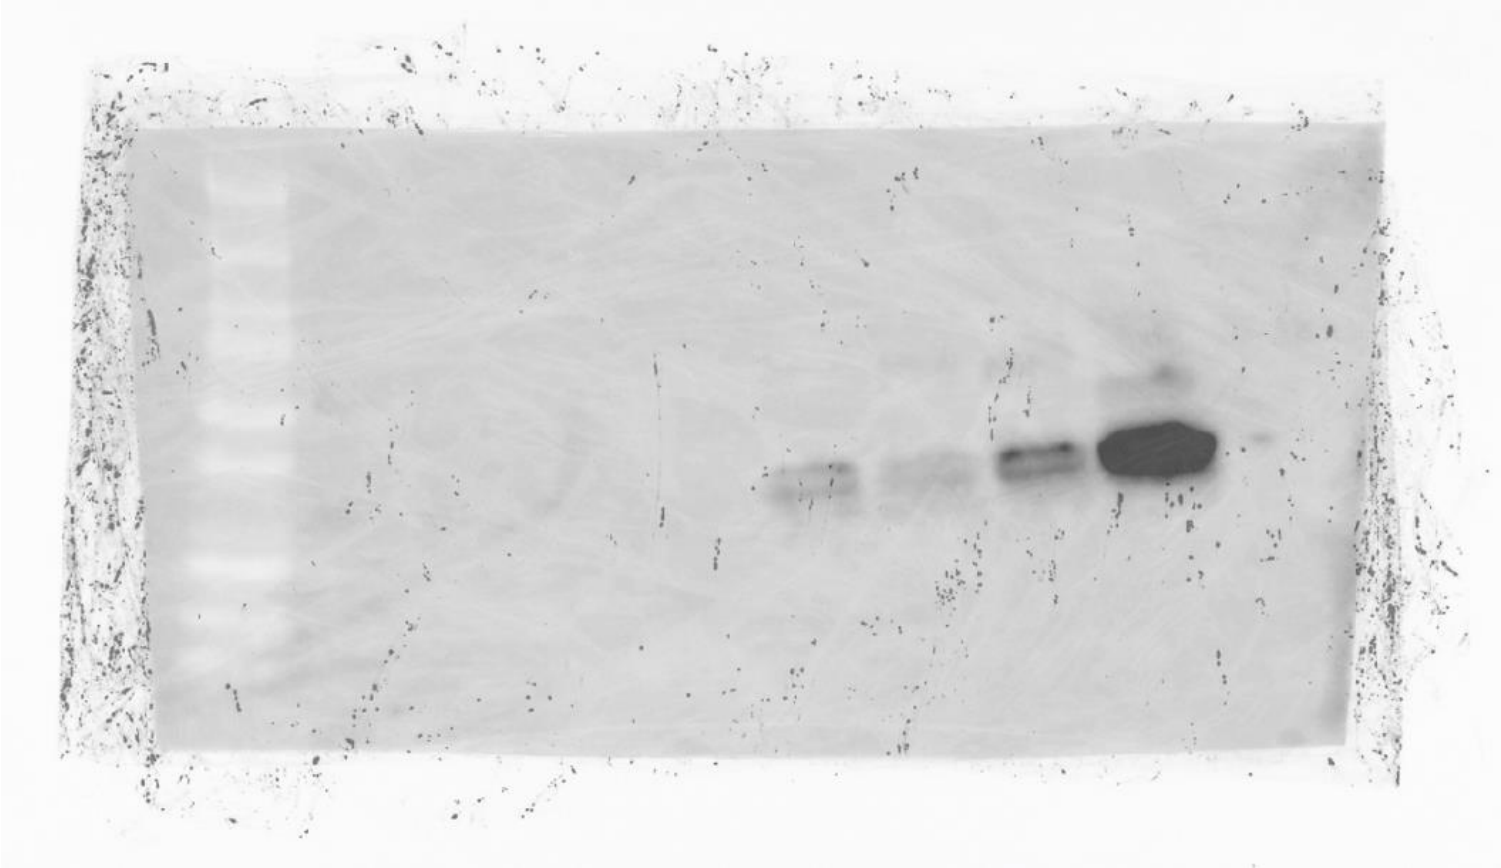

Supplement: sd2 [file 2]
